# Supplementary material
Source: publisher figshare collection journal article supplement (https://frontiersin.figshare.com/ndownloader/files/30681851)
Supplement: Supplementary file [file 30681851]

**Comparative genomic analysis uncovered evolution of pathogenicity factors, horizontal gene transfer events and heavy metal resistance traits in citrus canker bacterium *Xanthomonas citri* subsp. *citri***

**Chien-Jui Huan, Ting-Li W, Po-Xing Zheng, Jheng-Yang Ou, Hui-Fang Ni, Yao-Cheng Lin**

**Front. Microbiol. 12:731711.**

**doi: 10.3389/fmicb.2021.731711**

***Supplementary Material***

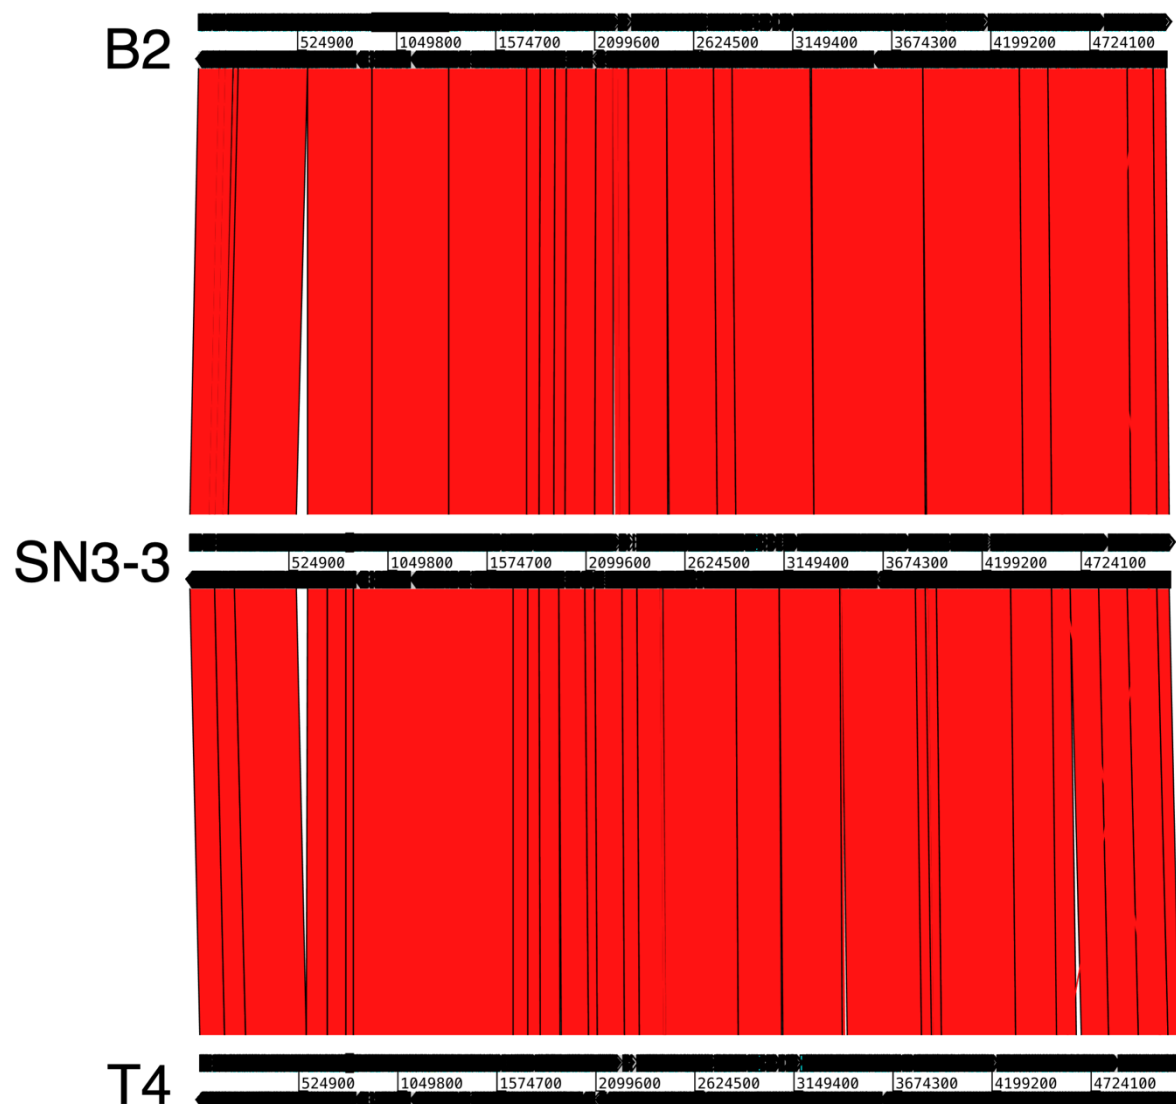

**Supplementary Figure 1.** Highly conserved chromosome sequences of the three sequenced strains. Each collinearity block represents >5,000 bp alignment and >99% sequence identity by BLASTN.

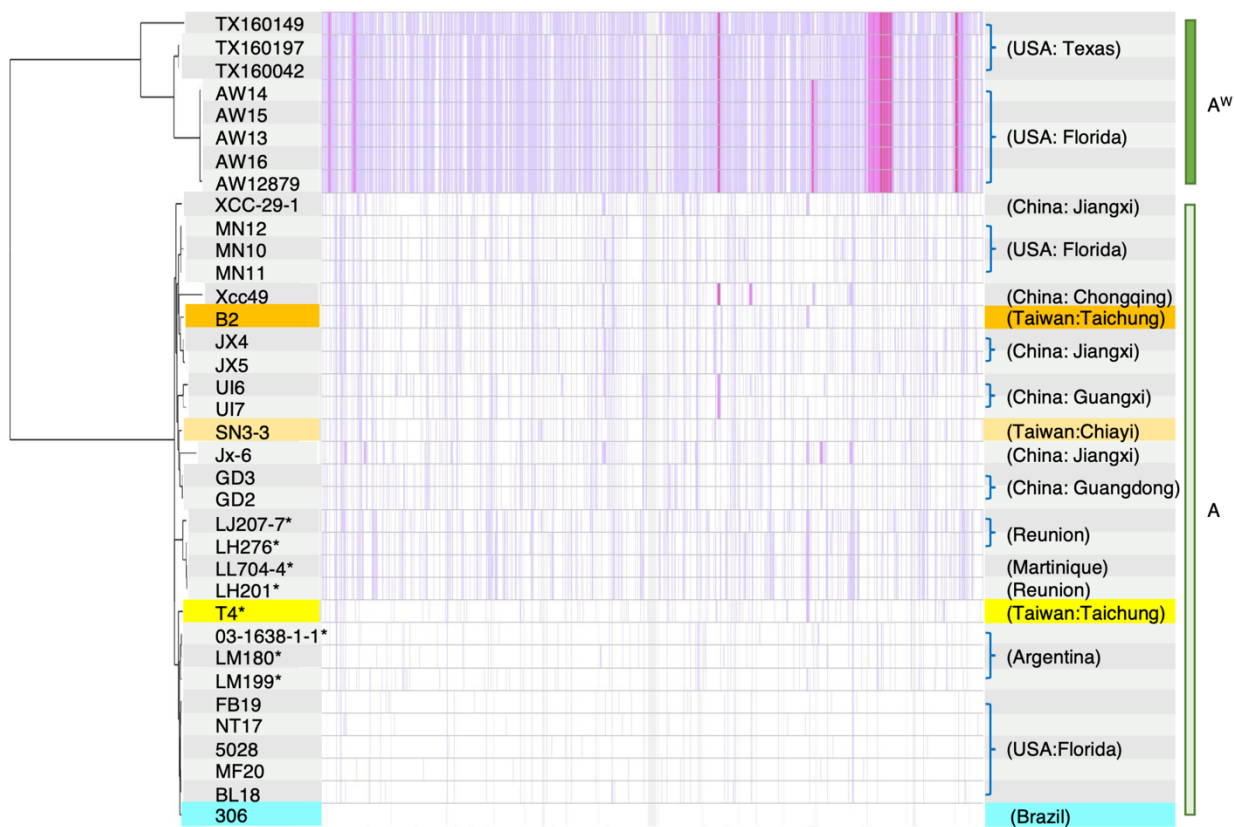

**Supplementary Figure 2.** Phylogenetic analysis based on whole genome comparison. The asterisks indicate copper-resistant strains.

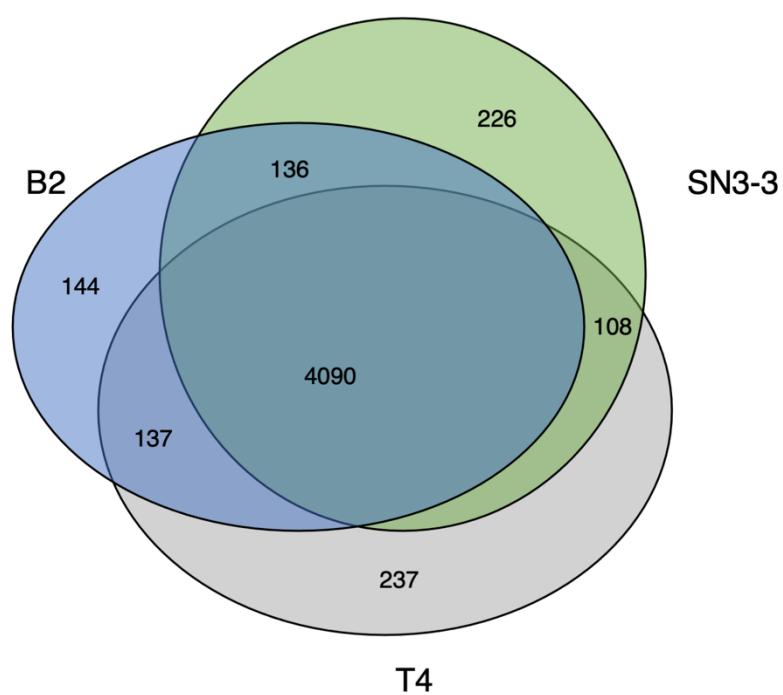

**Supplementary Figure 3.** Shared and unique protein coding genes in three sequenced strains.

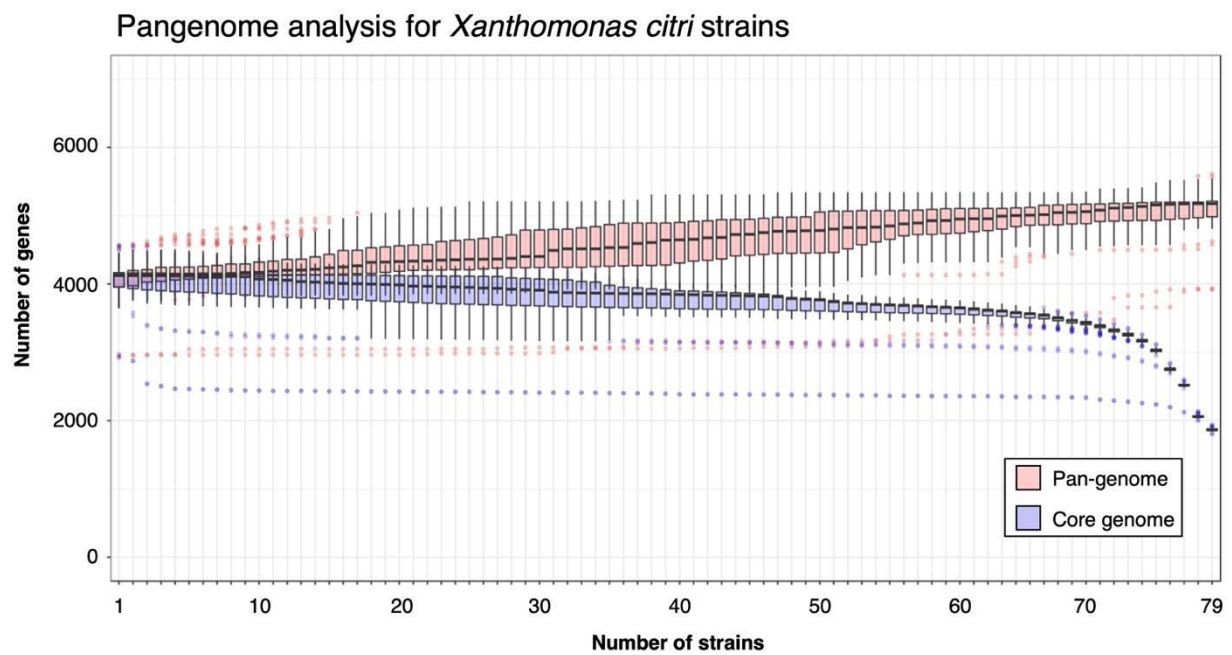

**Supplementary Figure 4.** Pangenome analysis of 79 *Xanthomonas* genomes.

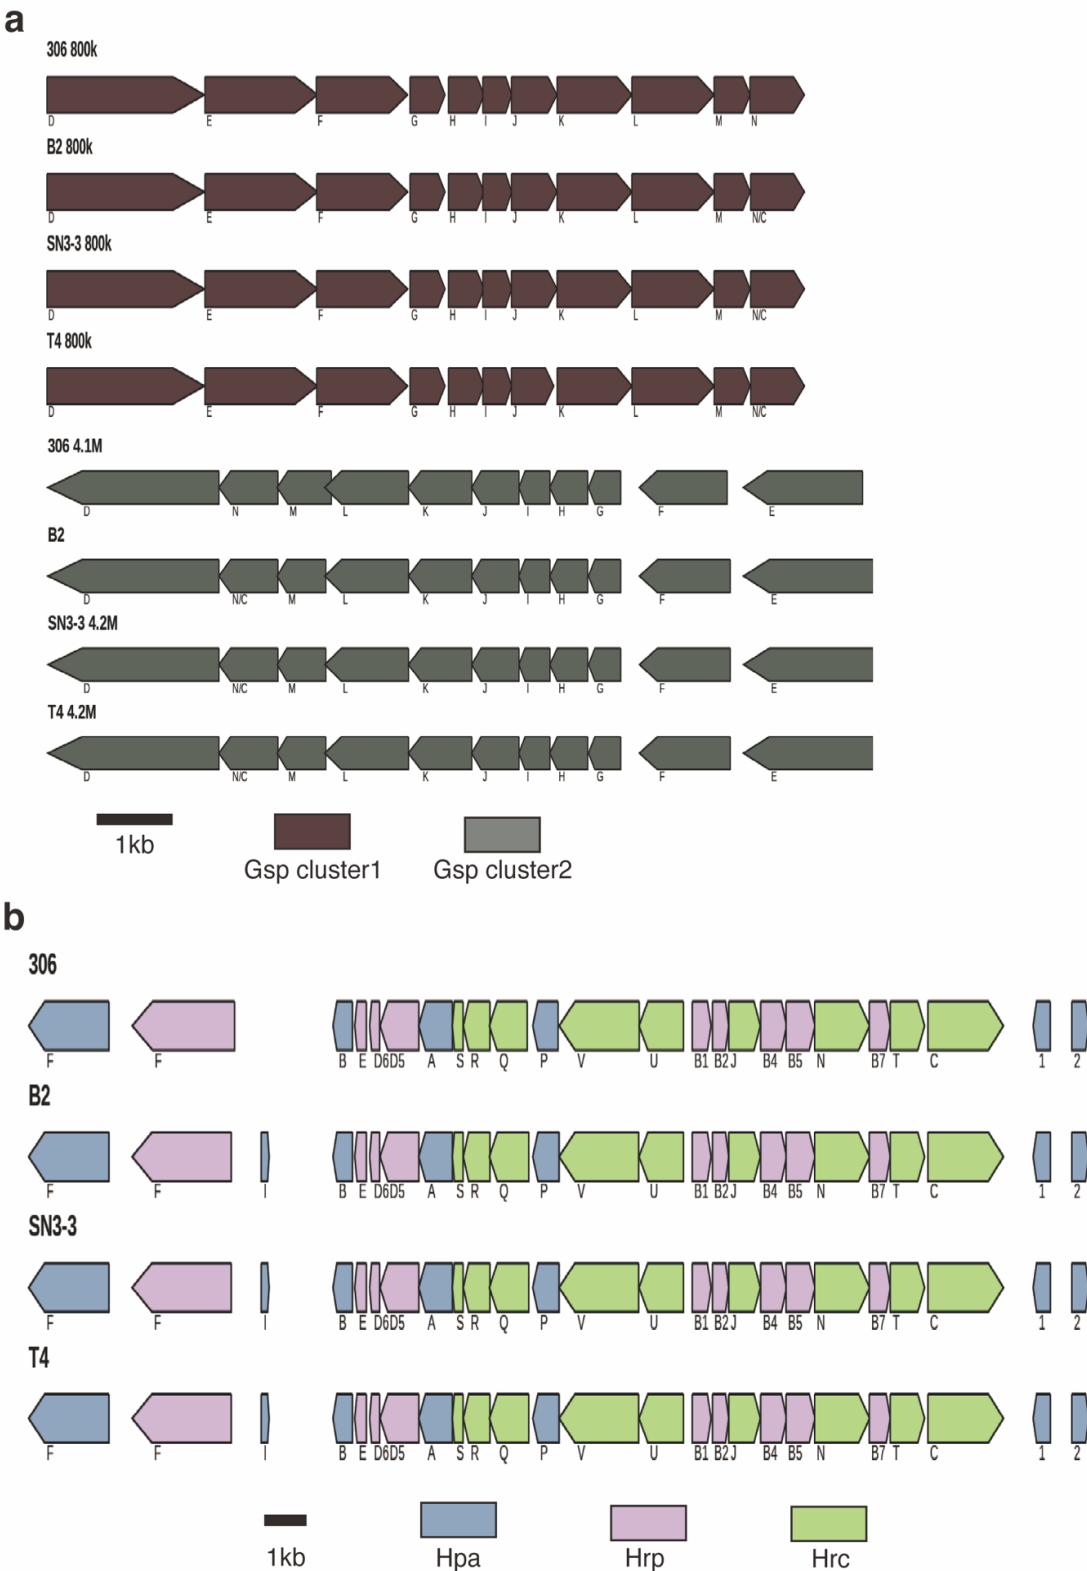

**Supplementary Figure 5.** Type II and III secretion systems. (A) Two operons of the type II secretion system. (B) Gene cluster of the type III secretion system

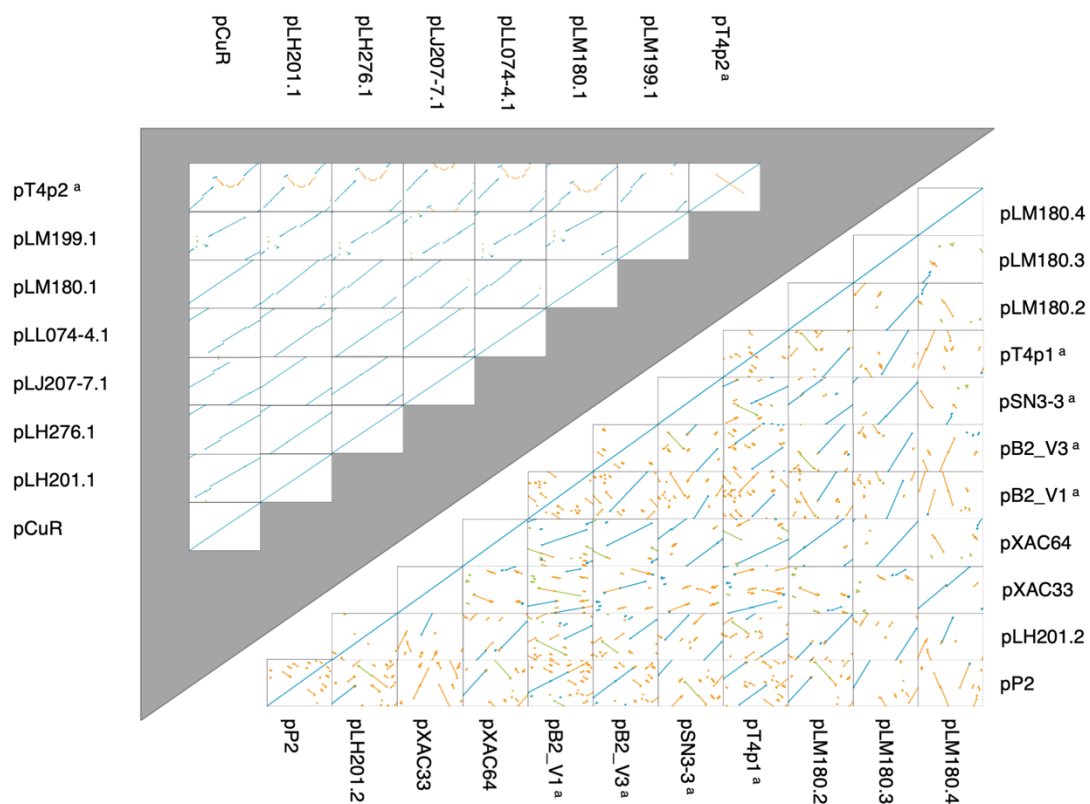

**Supplementary Figure 6.** Pairwise comparison of plasmids. Upper panel: copper resistance plasmids. Lower panel: pathogenicity related plasmids. Blue line: syntenic region in the same direction. Green: syntenic region in the reverse direction. Orange: secondary alignment. a. plasmids sequenced in this study.

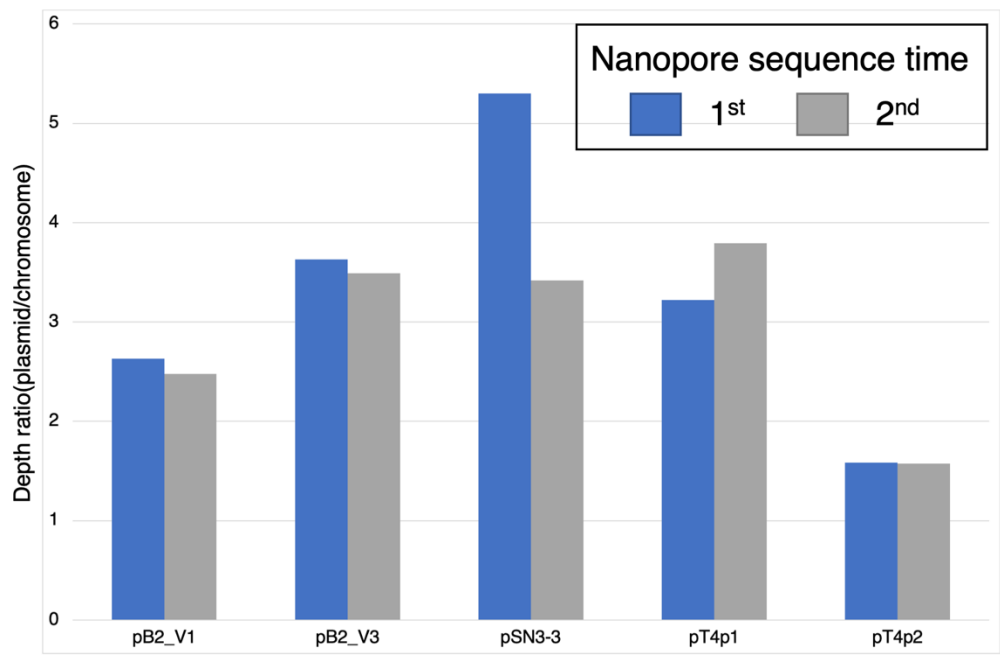

**Supplementary Figure 7.** Estimated plasmid copy number based on the Nanopore sequencing coverage.



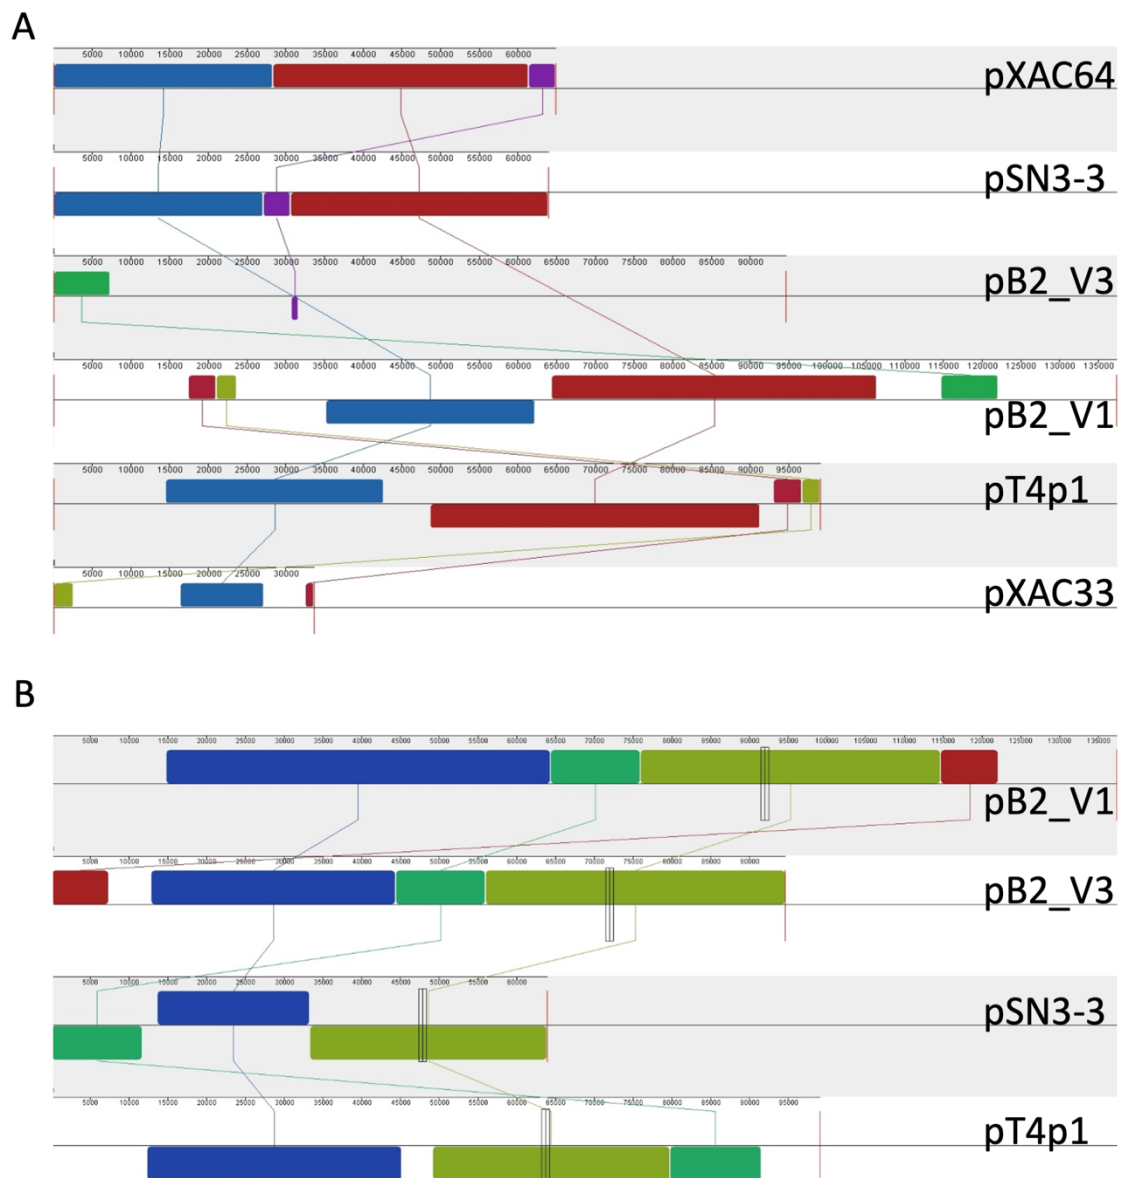

**Supplementary Figure 8.** Multiple plasmid alignment of pXAC33, pXAC64 and non-CuR plasmids sequenced in this study. (A) Mauve alignment including pXAC33, pXAC64 and plasmids in this study. (B) Mauve alignment of plasmids in this study. Syntenic regions share the same color.

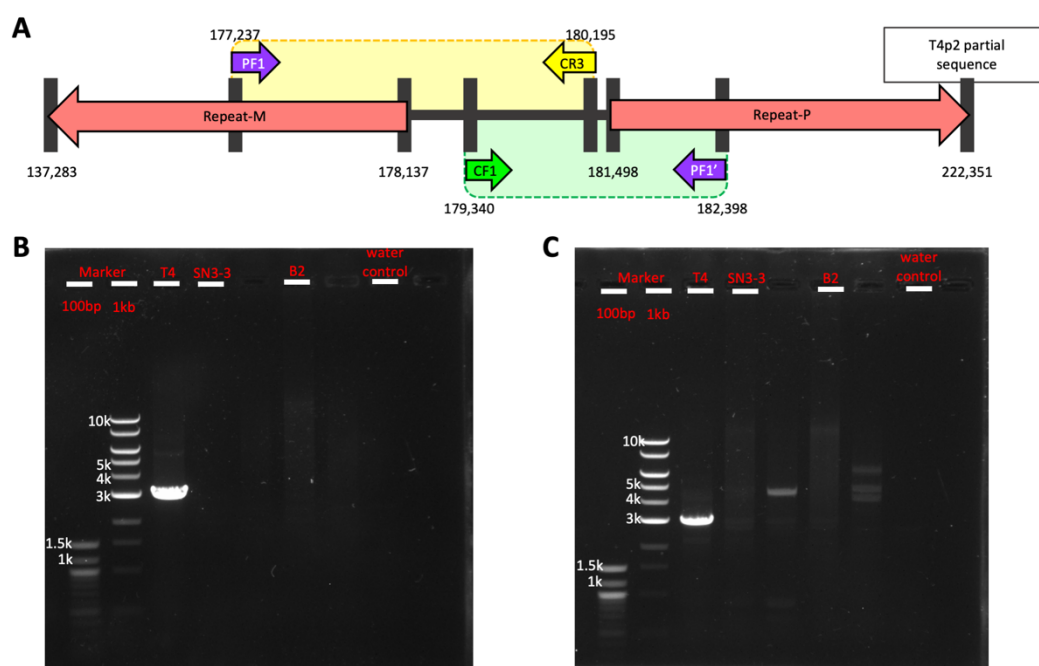

**Supplementary Figure 9.** Genome assembly confirmation of the copper-resistance plasmid pT4p2. (A) Genome structure of the 40 kbp inverted repeat. (B) PCR product of the PF1-CF1 primer pair and (C) PCR product of the PF1-CR3 primer pair.

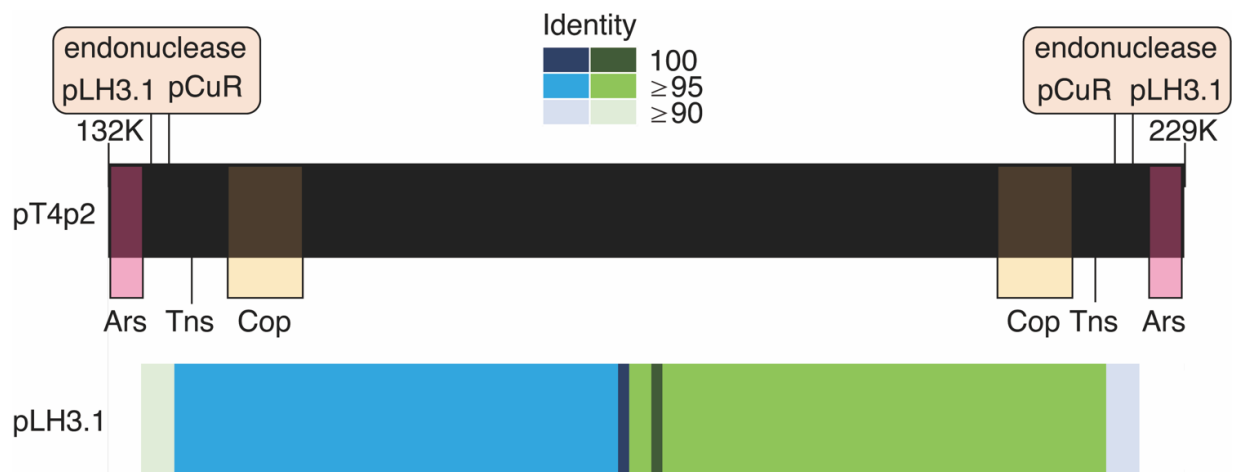

**Supplementary Figure 10.** Inverted duplication of metal-resistance clusters between pT4p2 and pLH3.1. Orange box (Cop): location of copper resistance gene clusters. Pink box (Ars): arsenate-resistant gene clusters. Tns: transposase.

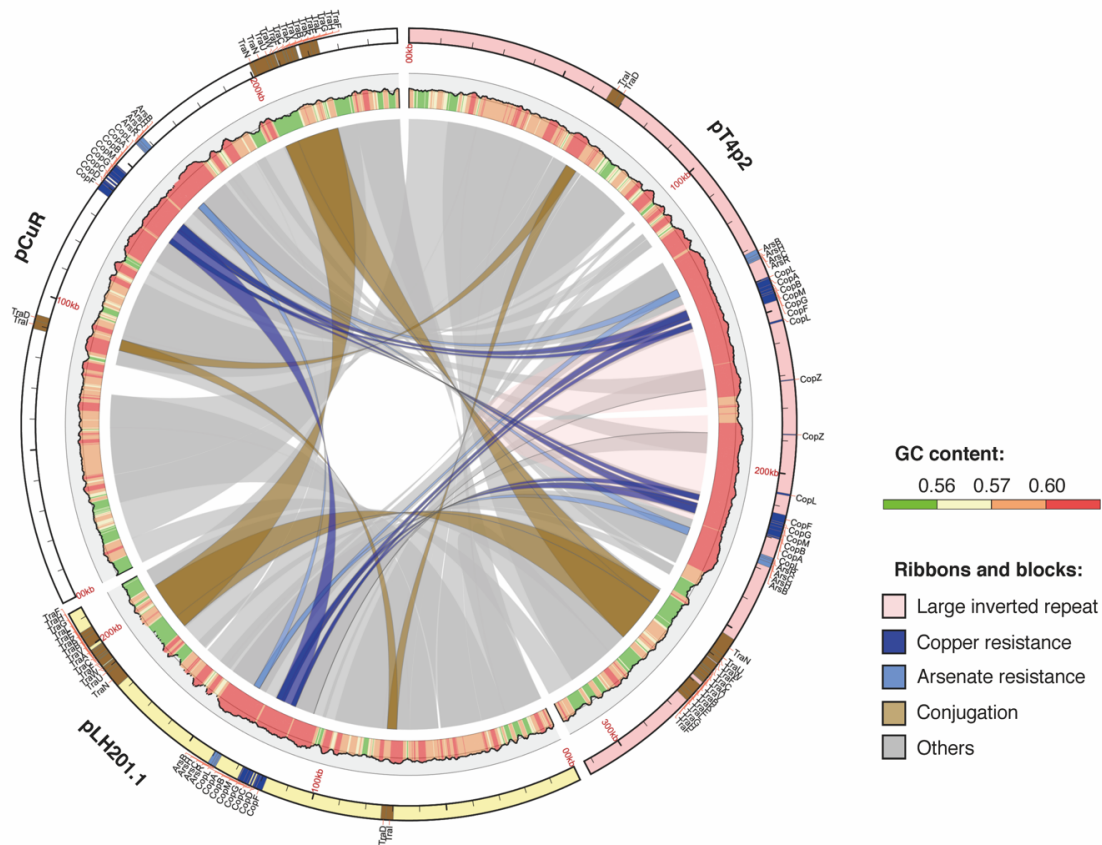

**Supplementary Figure 11.** Comparison of plasmids containing copper resistance genes in pT4p2, pCuR and pLH201.1. Circles from outermost to innermost represent: (1) position and genes, the grid is 10 kbp [pink, pT4p2 of strain T4; yellow, pLH201.1 (NZ\_CP018859.1) of strain LH201; white, pCuR (NZ\_CP023286.1) of strain 03-1638-1-1; (2) GC content with 2000-bp sliding window and 200-bp step; (3) regions with similar gene content and nucleotide sequence identity > 90%, and alignment length > 1kb between plasmids.

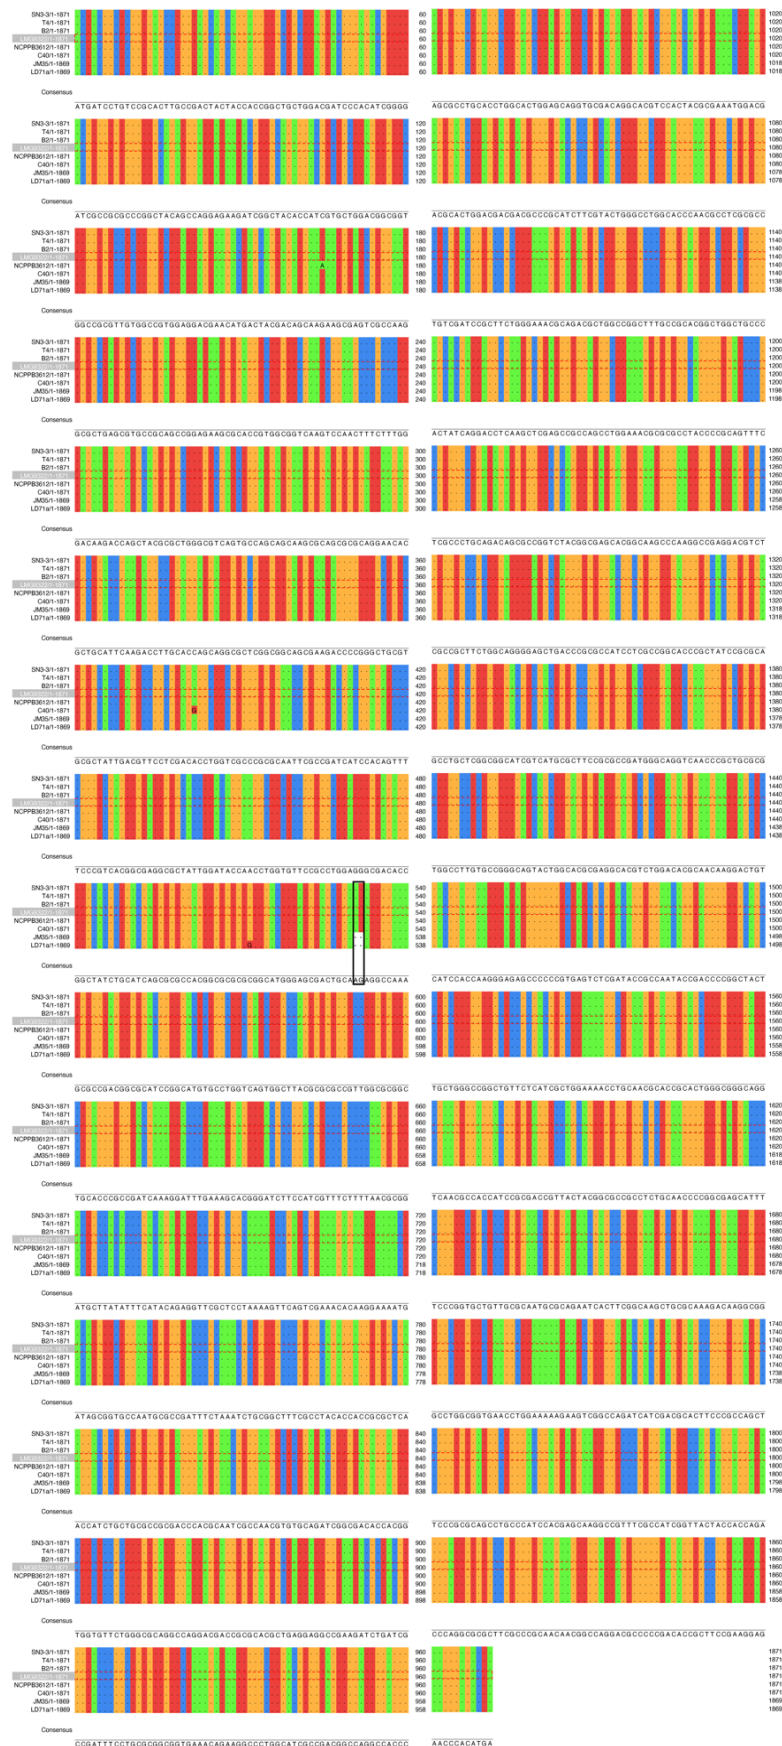

**Supplementary Figure 12.** Multiple sequence alignment of *csd1* and *cas8c* genes. Black box, around 530 nt, indicates the AG frameshift.
